# Supplementary material for: Emissions and photocatalytic selectivity of SrWO4:Ln3+ (Eu3+, Tb3+, Sm3+ and Dy3+) prepared by a supersonic microwave co-assistance method
Source: Royal Society of Chemistry journal article supplement (doi:10.1039/c2pp25184a), 2012-07-11
Supplement: c2pp25184a.pdf [file c2pp25184a.pdf]

*Supporting information for*

Emissions and photocatalytic selectivity of SrWO<sub>4</sub>: Ln<sup>3+</sup> (Eu<sup>3+</sup>, Tb<sup>3+</sup>, Sm<sup>3+</sup> and Dy<sup>3+</sup>) prepared by supersonic microwave co-assistance method (SMC)

Yuhui Zheng<sup>b</sup>, Jintai Lin<sup>b</sup>, Qianming Wang<sup>\*a,b</sup>

<sup>a</sup> *Key Laboratory of Theoretical Chemistry of Environment, Ministry of Education,*

*School of Chemistry and Environment, South China Normal University, Guangzhou 510006,*

*P. R. China*

<sup>b</sup> *School of Chemistry and Environment, South China Normal University, Guangzhou 510006,*

*P. R. China*

● To whom the correspondence should be addressed. E-mail: [qmwang@scnu.edu.cn](mailto:qmwang@scnu.edu.cn)

Tel: 86-20-39310187; Fax: 86-20-39310187

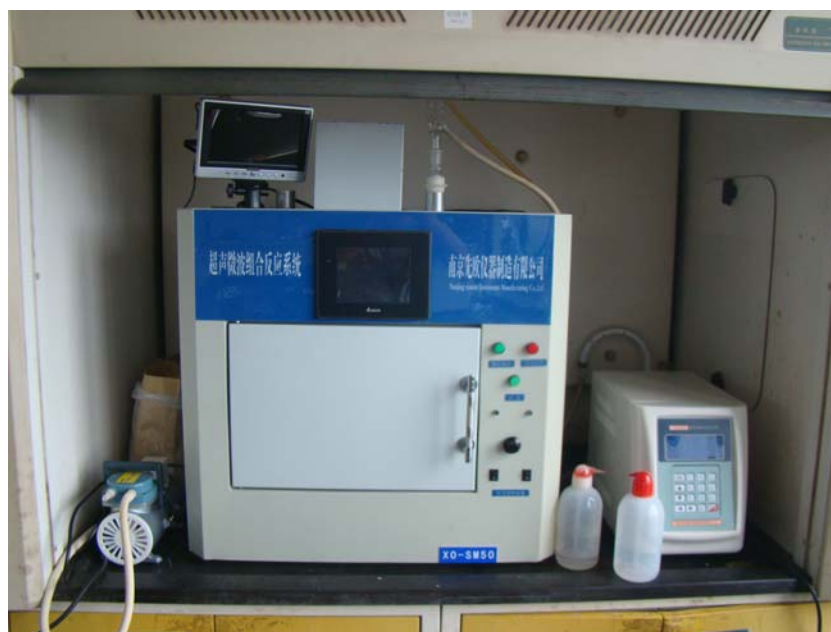

Supersonic assisted microwave reactor image in our lab.

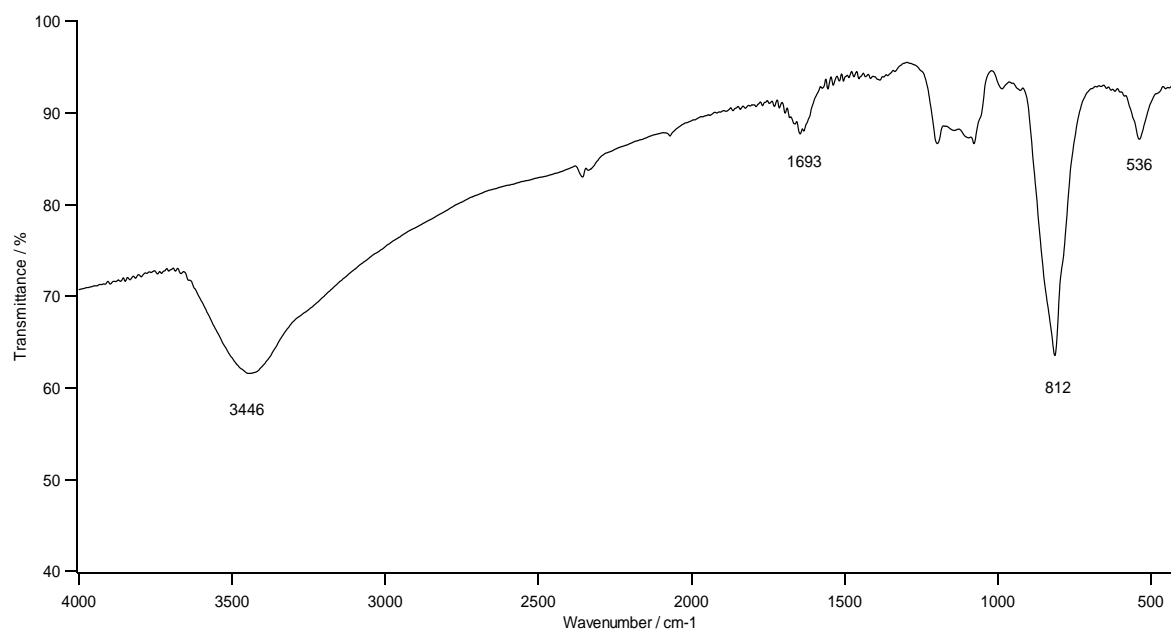

Figure S1 Infrared spectrum of SrWO<sub>4</sub>: Eu<sup>3+</sup>.

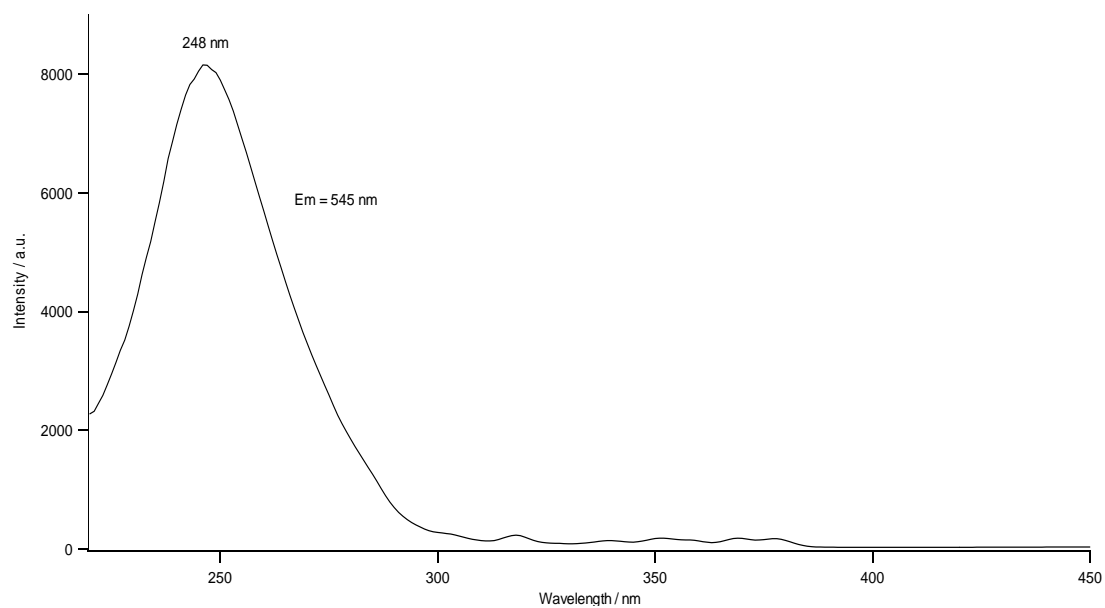

Figure S2 Excitation spectrum of SrWO<sub>4</sub>: Tb<sup>3+</sup> by SMC method.

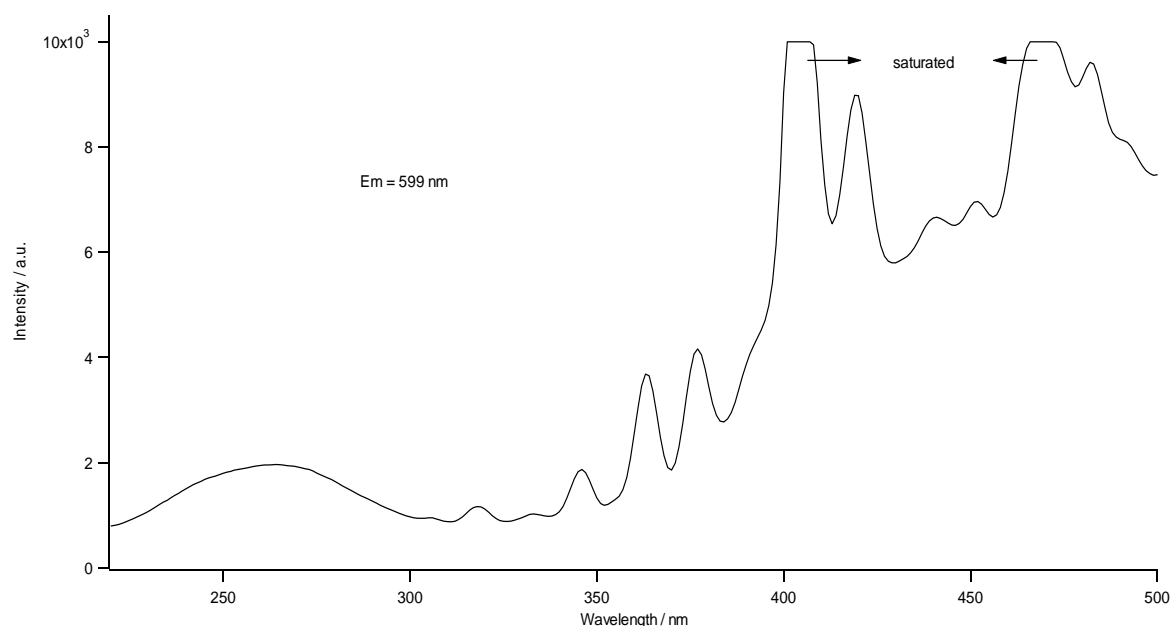

Figure S3 Excitation spectrum of SrWO<sub>4</sub>: Sm<sup>3+</sup> by SMC method.

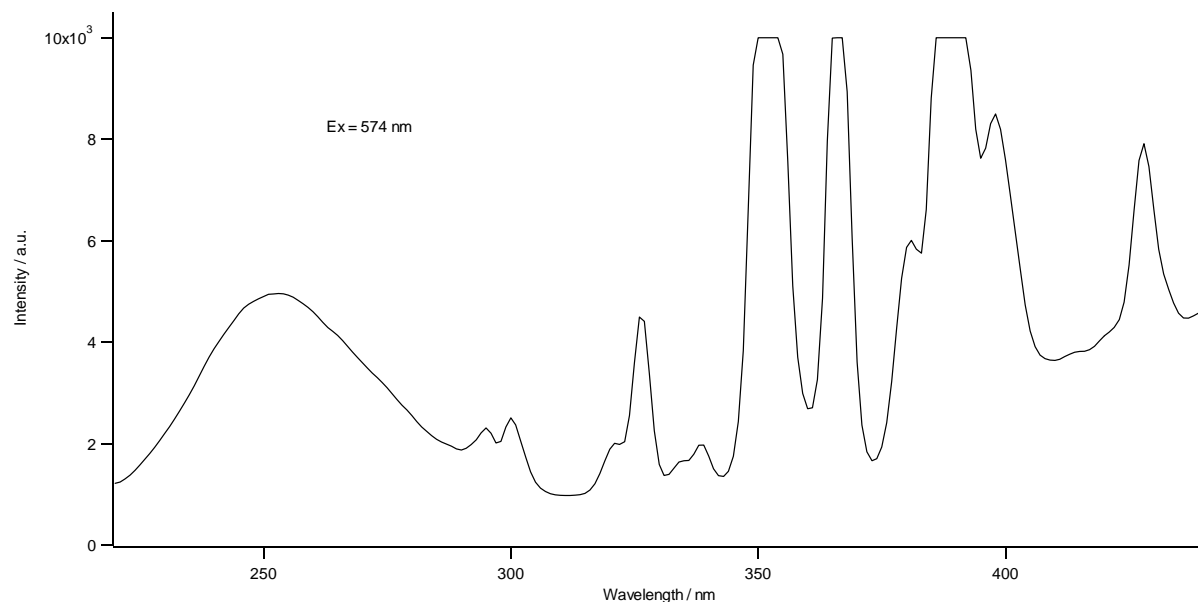

Figure S4 Excitation spectrum of SrWO<sub>4</sub>: Dy<sup>3+</sup> by SMC method.

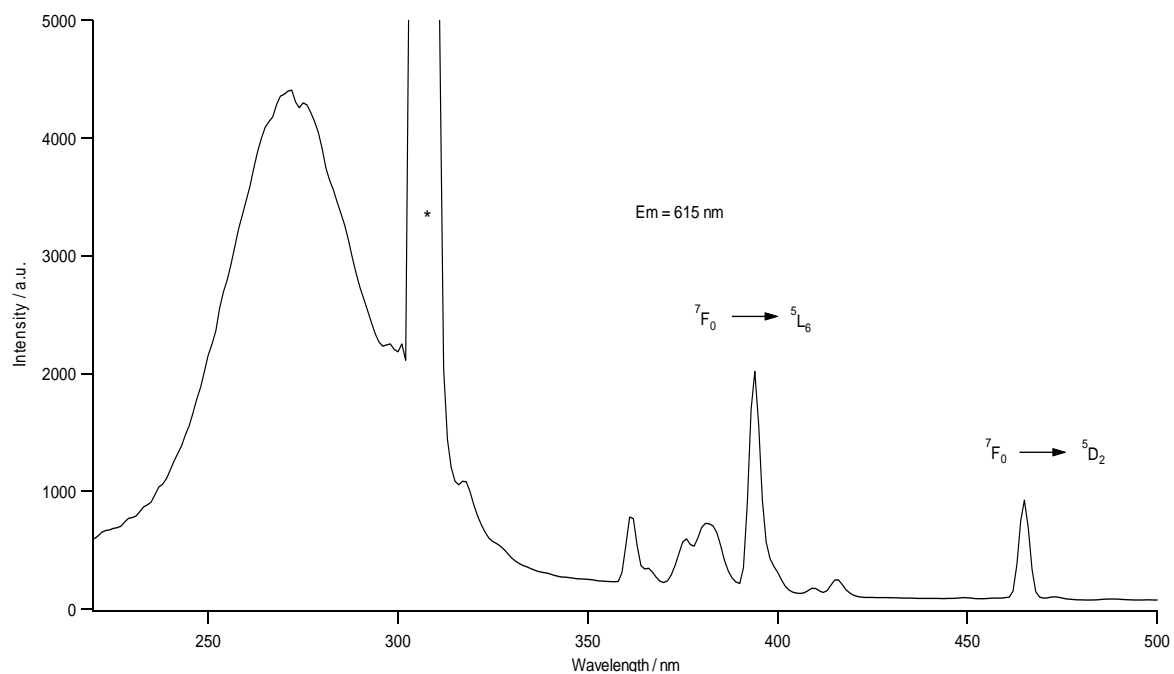

Figure S4 Excitation spectrum of SrWO<sub>4</sub>: Eu<sup>3+</sup> by SMC method (\* indicates artifacts of scattering).

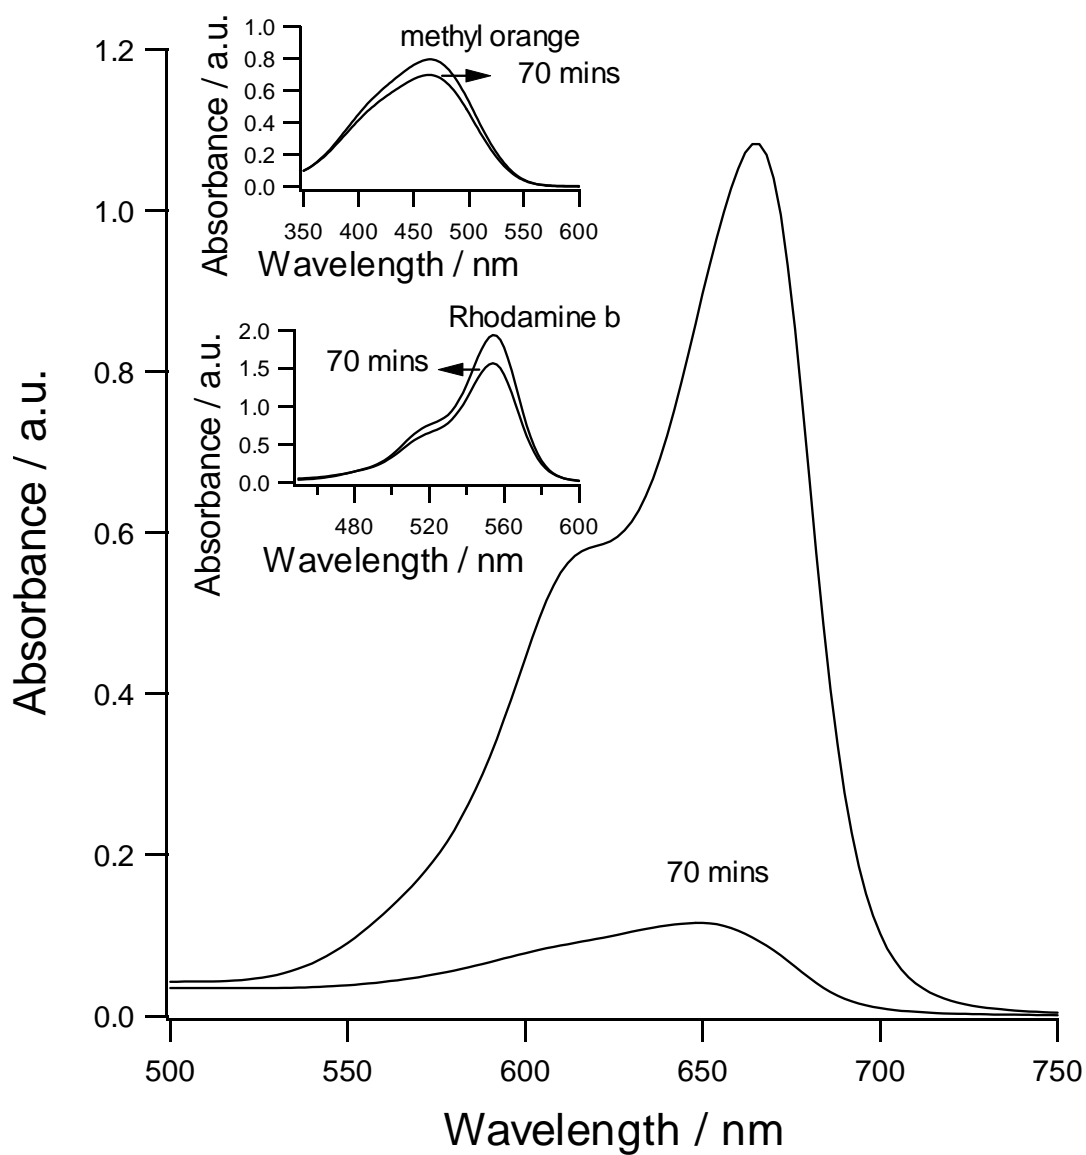

Figure S5 Photocatalytic activities of SrWO<sub>4</sub>: Eu<sup>3+</sup> for methylene blue. Inset: photocatalytic activities of SrWO<sub>4</sub>: Eu<sup>3+</sup> for methyl orange or rhodamine b (irradiation by a 500 W mercury lamp for 70 minutes).

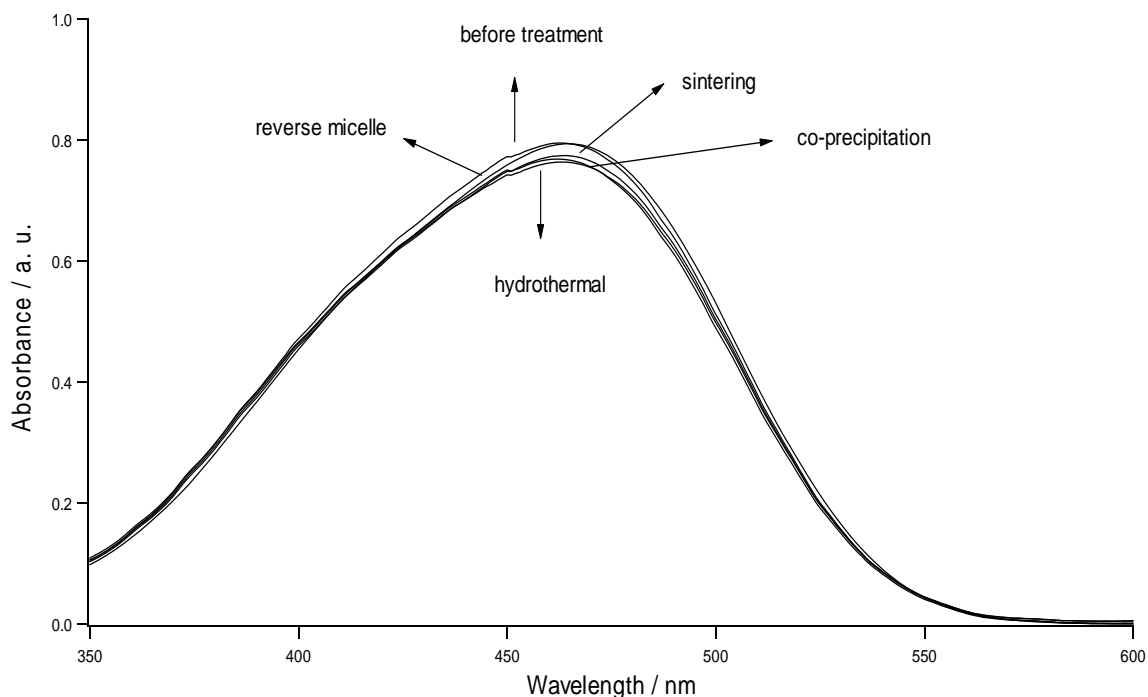

Figure S6 Photocatalytic behavior ( $\text{SrWO}_4: \text{Eu}^{3+}$ ) for methyl orange by co-precipitation, hydrothermal, sintering or reverse micelle (irradiation by a 500 W mercury lamp for 70 minutes).

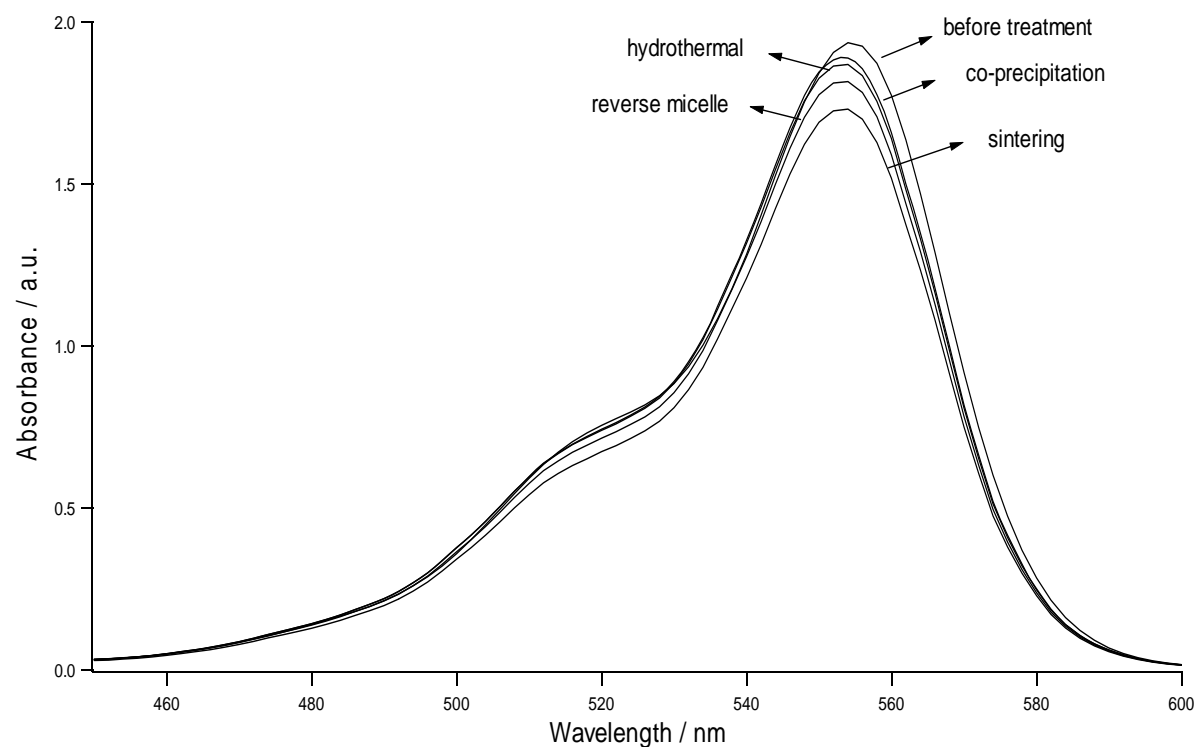

Figure S7 Photocatalytic behavior ( $\text{SrWO}_4: \text{Eu}^{3+}$ ) for rhodamine b by co-precipitation, hydrothermal, sintering or reverse micelle (irradiation by a 500 W mercury lamp for 70 minutes).
